# Supplementary material
Source: MDPI journal article supplement (https://www.mdpi.com/2072-4292/11/4/444)
Supplement: s1 [file s1]

## Supplementary information

# Shrinkage of Nepal's Second Largest Lake (Phewa Tal) Due to Watershed Degradation and Increased Sediment Influx

C. Scott Watson<sup>1\*</sup>, Jeffrey S. Kargel<sup>2</sup> and Dhananjay Regmi<sup>3</sup>, Summer B. Rupper<sup>4</sup>, Joshua M. Maurer<sup>5</sup>, Alina Karki<sup>6</sup>

<sup>1</sup> Department of Hydrology & Atmospheric Sciences, University of Arizona, Tucson, USA

<sup>2</sup> Planetary Science Institute, Tucson, USA

<sup>3</sup> Himalayan Research Center, Lainchaur, Kathmandu, Nepal

<sup>4</sup> Department of Geography, University of Utah, Salt Lake City, USA

<sup>5</sup> Department of Earth and Environmental Sciences, Columbia University, New York, USA

<sup>6</sup> Nepal Electricity Authority, Kathmandu, 44600, Nepal

\* Correspondence: [scott@rockyglaciers.co.uk](mailto:scott@rockyglaciers.co.uk)

**Table 1.** ASTER Thermal Infrared (TIR) and Landsat Thermal Infrared Sensor (TIRS) imagery used to derive lake temperature.

| Sensor         | Date        | Time (NPT) | Mean temperature (°C) | Standard deviation (°C) |
|----------------|-------------|------------|-----------------------|-------------------------|
| ASTER TIR      | 7-May-2018  | 10:57      | 26.4                  | 0.3                     |
|                | 6-Oct-2015  | 10:57      | 28.1                  | 0.2                     |
|                | 22-May-2012 | 10:56      | 26.9                  | 0.3                     |
|                | 9-Apr-2008  | 10:56      | 23.6                  | 0.2                     |
|                | 10-Feb-2004 | 10:57      | 17.7                  | 0.2                     |
|                | 5-Oct-2003  | 10:56      | 27.3                  | 0.2                     |
|                | 2-Oct-2002  | 10:57      | 29.0                  | 0.2                     |
|                | 17-Feb-2001 | 11:08      | 19.0                  | 0.2                     |
|                | 15-Dec-2000 | 11:09      | 19.3                  | 0.2                     |
|                | 29-Nov-2000 | 11:09      | 21.8                  | 0.2                     |
| Landsat 8 TIRS | 17-May-2013 | 10:41      | 21.7                  | 0.1                     |
|                | 8-Oct-2013  | 10:41      | 21.9                  | 0.2                     |
|                | 24-Oct-2013 | 10:40      | 21.6                  | 0.1                     |
|                | 24-Oct-2013 | 10:41      | 21.6                  | 0.1                     |
|                | 9-Nov-2013  | 10:41      | 19.6                  | 0.1                     |
|                | 25-Nov-2013 | 10:40      | 18.1                  | 0.1                     |
|                | 25-Nov-2013 | 10:41      | 18.1                  | 0.1                     |
|                | 11-Dec-2013 | 10:40      | 17.0                  | 0.1                     |
|                | 11-Dec-2013 | 10:41      | 17.0                  | 0.1                     |
|                | 27-Dec-2013 | 10:40      | 15.3                  | 0.1                     |
|                | 12-Jan-2014 | 10:40      | 13.6                  | 0.1                     |
|                | 28-Jan-2014 | 10:40      | 15.4                  | 0.1                     |
|                | 13-Feb-2014 | 10:40      | 15.8                  | 0.1                     |
|                | 17-Mar-2014 | 10:40      | 19.1                  | 0.1                     |
|                | 2-Apr-2014  | 10:39      | 21.5                  | 0.1                     |

---

|             |       |      |     |
|-------------|-------|------|-----|
| 20-May-2014 | 10:39 | 23.6 | 0.1 |
| 11-Oct-2014 | 10:39 | 22.7 | 0.1 |
| 27-Oct-2014 | 10:39 | 20.1 | 0.1 |
| 12-Nov-2014 | 10:39 | 20.8 | 0.0 |
| 16-Feb-2015 | 10:39 | 15.2 | 0.1 |
| 23-May-2015 | 10:38 | 24.6 | 0.1 |
| 8-Jun-2015  | 10:38 | 25.8 | 0.1 |
| 14-Oct-2015 | 10:39 | 20.8 | 0.1 |
| 1-Dec-2015  | 10:39 | 18.2 | 0.1 |
| 17-Dec-2015 | 10:39 | 16.4 | 0.0 |
| 2-Jan-2016  | 10:39 | 15.2 | 0.1 |
| 2-Jan-2016  | 10:39 | 15.2 | 0.1 |
| 18-Jan-2016 | 10:39 | 15.1 | 0.1 |
| 18-Jan-2016 | 10:39 | 15.1 | 0.1 |
| 3-Feb-2016  | 10:39 | 14.9 | 0.1 |
| 3-Feb-2016  | 10:39 | 14.9 | 0.1 |
| 22-Mar-2016 | 10:39 | 20.2 | 0.1 |
| 23-Apr-2016 | 10:39 | 23.5 | 0.1 |
| 1-Nov-2016  | 10:39 | 21.5 | 0.1 |
| 1-Nov-2016  | 10:39 | 21.5 | 0.1 |
| 17-Nov-2016 | 10:39 | 19.8 | 0.1 |
| 17-Nov-2016 | 10:39 | 19.8 | 0.1 |
| 3-Dec-2016  | 10:39 | 17.4 | 0.1 |
| 19-Dec-2016 | 10:39 | 16.9 | 0.0 |
| 19-Dec-2016 | 10:39 | 16.9 | 0.1 |
| 4-Jan-2017  | 10:39 | 15.8 | 0.1 |
| 20-Jan-2017 | 10:39 | 15.6 | 0.1 |
| 21-Feb-2017 | 10:39 | 17.5 | 0.1 |
| 25-Mar-2017 | 10:39 | 19.8 | 0.1 |
| 10-Apr-2017 | 10:39 | 22.8 | 0.0 |
| 26-Apr-2017 | 10:38 | 23.7 | 0.1 |
| 17-Sep-2017 | 10:39 | 23.8 | 0.1 |
| 19-Oct-2017 | 10:39 | 23.3 | 0.1 |
| 19-Oct-2017 | 10:39 | 23.3 | 0.1 |
| 4-Nov-2017  | 10:39 | 20.7 | 0.1 |
| 20-Nov-2017 | 10:39 | 20.1 | 0.1 |
| 20-Nov-2017 | 10:39 | 20.1 | 0.1 |
| 22-Dec-2017 | 10:39 | 16.6 | 0.1 |
| 7-Jan-2018  | 10:39 | 14.7 | 0.0 |
| 23-Jan-2018 | 10:39 | 15.2 | 0.1 |
| 8-Feb-2018  | 10:39 | 15.8 | 0.1 |
| 24-Feb-2018 | 10:39 | 16.4 | 0.1 |
| 13-Apr-2018 | 10:38 | 21.7 | 0.1 |

---



**Table S2.** RapidEye imagery used to derive normalised difference vegetation indexes s.

| Satellite  | Date        |
|------------|-------------|
| RapidEye 1 | 14-Dec-2010 |
| RapidEye 2 | 9-Nov-2011  |
| RapidEye 4 | 16-Nov-2012 |
| RapidEye 1 | 6-Nov-2013  |
| RapidEye 3 | 17-Dec-2014 |
| RapidEye 2 | 31-Oct-2015 |
| RapidEye 1 | 5-Nov-2016  |
| RapidEye 1 | 10-Nov-2017 |

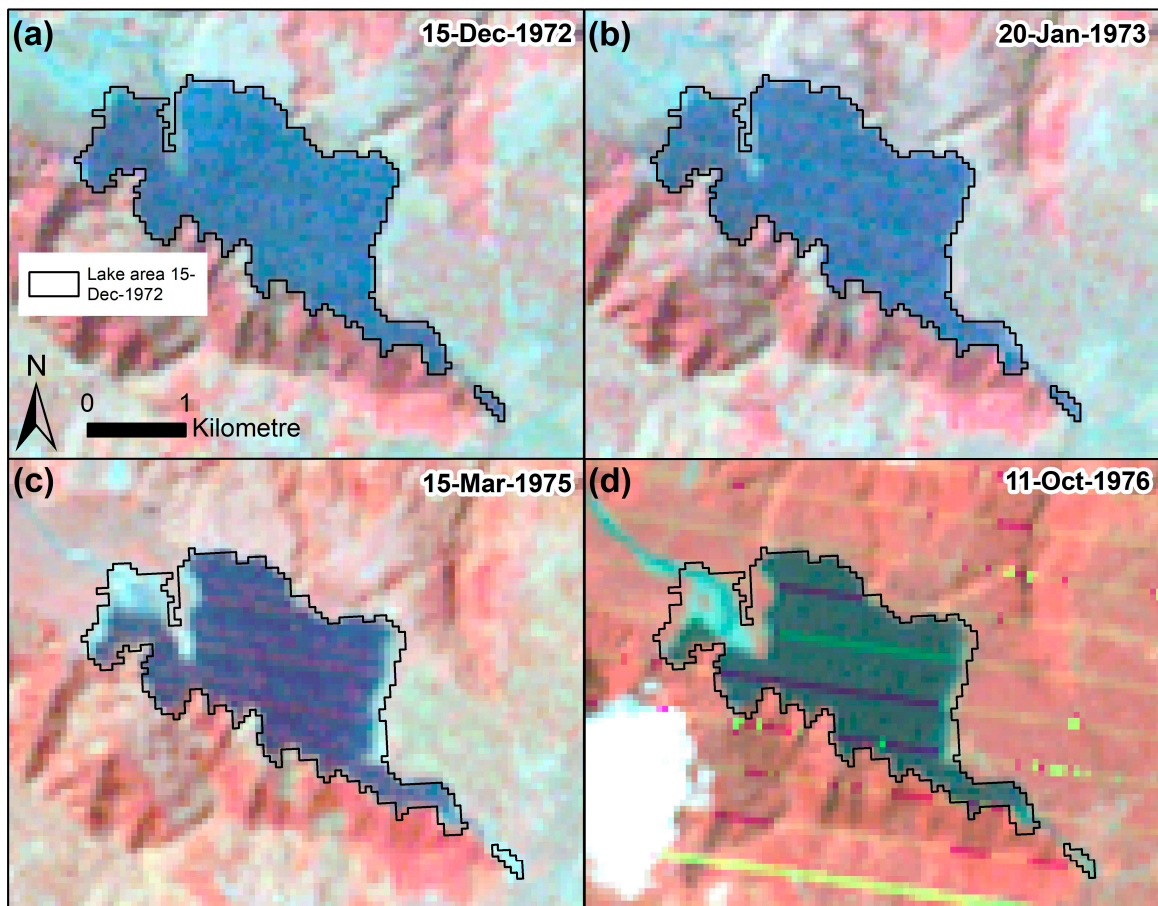**Figure S1.** Lake area shrinkage due to the 1975 dam failure. The lake outline from 15 December 1972 is shown on all panels. **(a–d)** Landsat Multispectral Scanner background false colour composite (near-infrared, red, green).

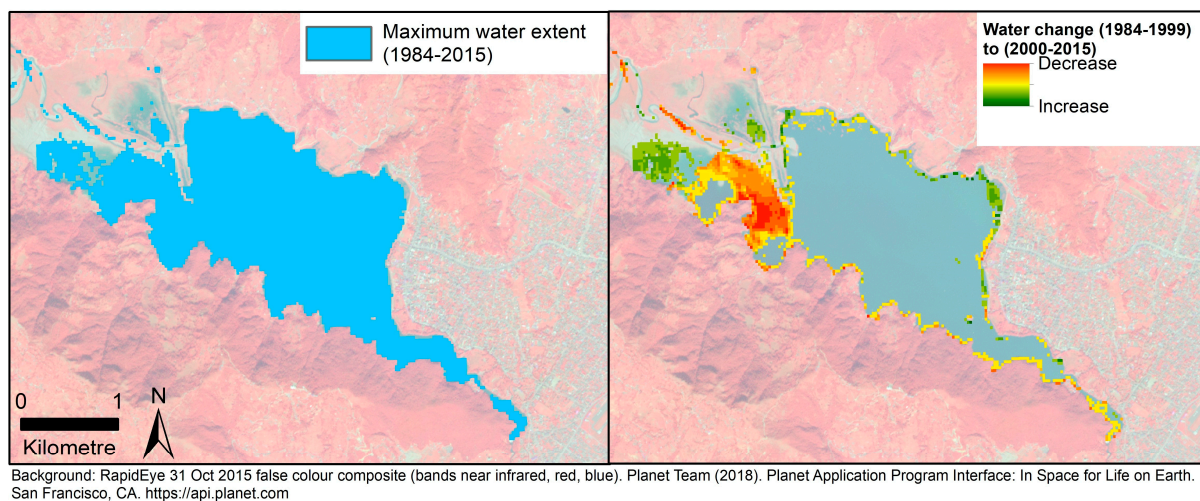

**Figure S2.** Surface water extent and change from Landsat image classification by Pekel et al. (2016).

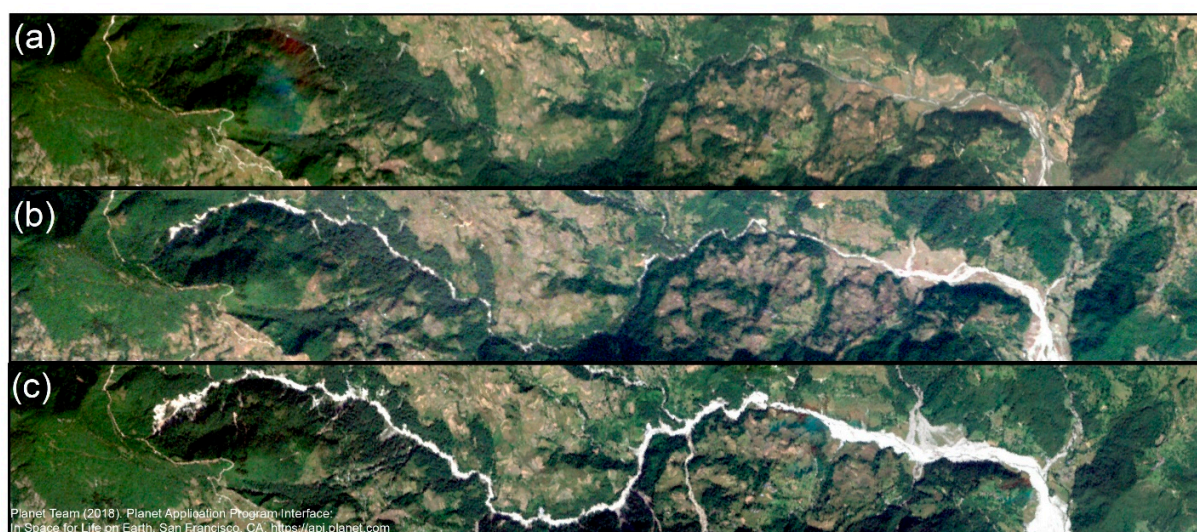

**Figure S3.** Landslide activity in the upper Phewa catchment (Figure 7) revealed by RapidEye true colour imagery from: (a) 6 November 2013; (b) 17 December 2014; (c) 31 October 2015.



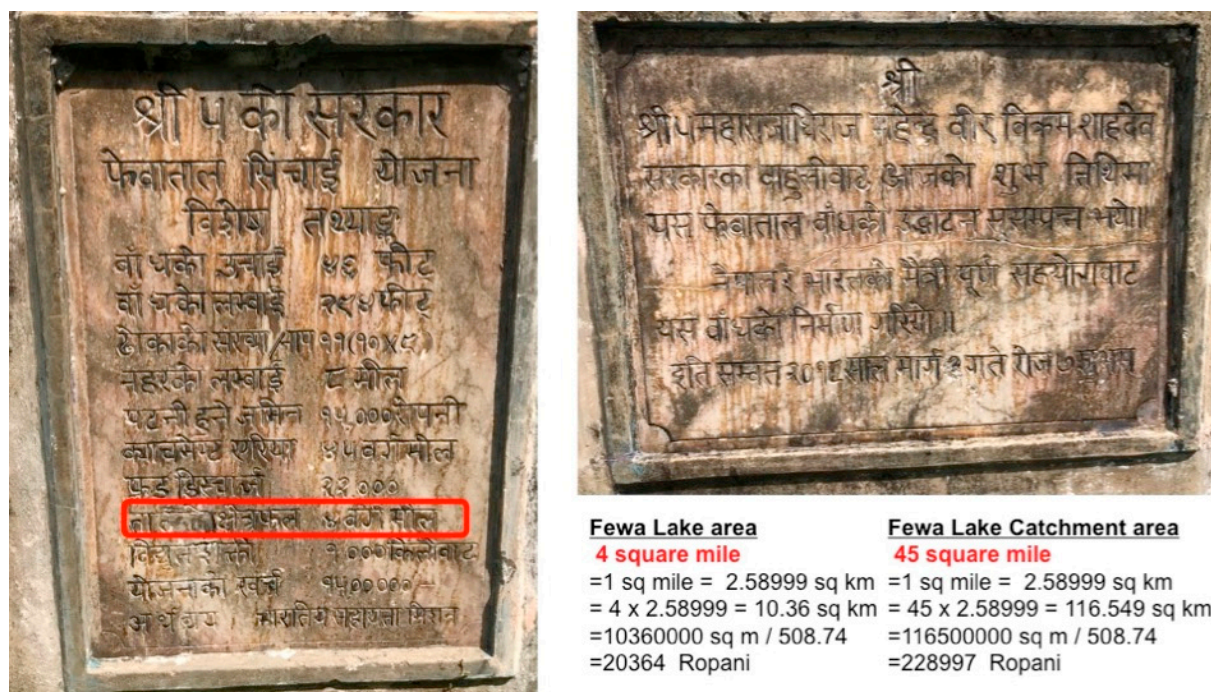

Figure S4. Stone inscription used at the time of the inauguration of a dam on 16 January 1962.

### Geological Controls on Landsliding and Silt Production

Geology— along with slope and precipitation factors considered by Dhakal (2016)— is an underpinning of both the suspended sediment load of the Phewa watershed and of the landslide and debris flow production and delivery of sediment to the watershed's rivers, such as Harpan Khola. Bedrock formation nomenclature, stratigraphic positions, and tectonics are inconsistently mapped in Nepal's Lesser Himalaya, including Pokhara Valley. Older mapping—though still in use—consider the whole area of the Pokhara Valley's bedrock to be in the Seti formation (gray to greenish gray phyllites, gritty phyllites, quartzites with minor conglomeratic layers and basic intrusions; Hada 1982). Newer mapping considers the Phewa watershed bedrock to be divided between the Kuncha formation (meta-sandstone, phyllite, and conglomerate; also termed the “Ranimata formation”) and Fagfog Quartzite (quartzite-phyllite-amphibolite) (Koirala et al. 1998, Paudel and Arita 2000, DeCelles et al. 2004, Martin et al. 2011, Cross 2014). Our observations indicate that phyllite, psammitic (sand-derived) and pelitic (mud/silt-derived) mica schist, meta-conglomerate, and quartzite dominate the Harpan Valley and its main tributary, the Andheri Khola valley. Examples from a 2015 landslide in the Harpan Valley, derived from the Kuncha formation, are highlighted in Figure S5. Though conglomerate and coarse-grained quartzite is present, the mineralogical content of most rocks observed in the area include a preponderance of silt-size quartz, as well as mica minerals, muscovite and biotite. The preserved bedding and metamorphic schistosity may lend itself to rock failure along those micro- and meso-structural contacts; furthermore, high-energy landslides may tend to break down along the contacts and grain boundaries of the micaceous rocks to produce large amounts of silt composed mainly of the minerals seen in Figure S5. That fine material is then carried in suspension by the Harpan/Andheri River system to Phewa Lake.

Koirala et al. (1998) mapped a large number of active and old landslides; most are within the Kuncha formation. Disproportionately far fewer landslides are developed in the Fagfog Quartzite—though these include the largest 2015 landslide—and most of those are located very near the contact with the Kuncha formation. Many other large landslides in Nepal are also developed in the Kuncha formation, such as the giant Jure landslide. The Harpan watershed's largest 2015 landslide (detailed in Figure S3) occurs on the axis of an anticlinal fold. The anticline and other folds extend up the Harpan Valley from Phewa Lake to that landslide. Newer geological mapping indicates that a major tectonic thrust—the Ramgarh Thrust—cuts through the area. The major tectonic features may have weakened the rocks and juxtaposed contrasting lithologies, which can contribute to landslide development. The fact that the same landslides are repeatedly reactivated in the Harpan-Andheri valley indicates that the weakness vulnerabilities extend deep into the bedrock, as, of course, the main tectonic structures do. Conditioning and triggering of landslides by earthquakes, road building, and monsoon precipitation are expected to be frequent reoccurrences and to affect the Kuncha formation disproportionately and mainly spare the Fagfog Quartzite, except near its stratigraphic contact with the Kuncha formation. Larger landslides than those of 2015 are possible and could cause big spikes in the siltation of Phewa Lake.

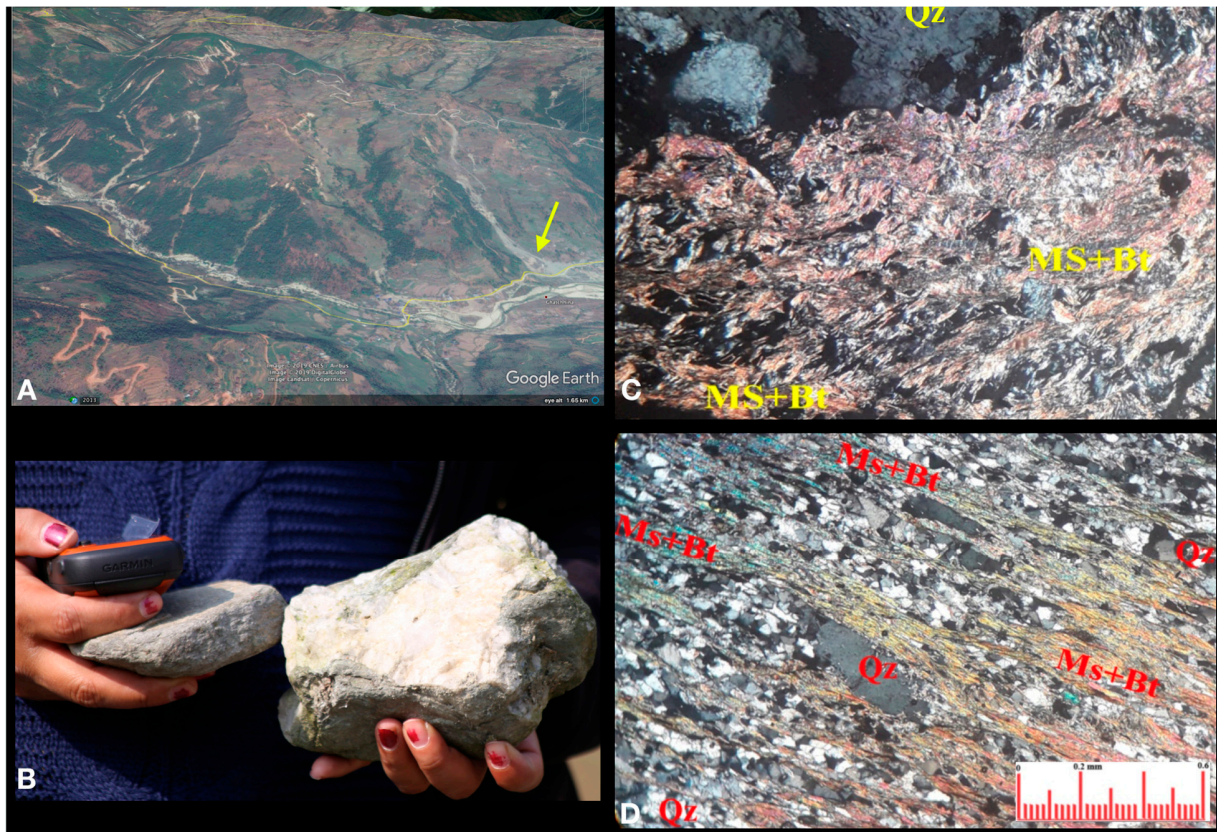

**Figure S5.** (a) A 2015 landslide sourced in the Kuncha formation and nearly reaching Harpan Khola, composed of rocks such as these (b) shown in the thin section (crossed polarizers): (c) the pelitic schist and (d) psammitic schist, commonly forming meta-conglomerate ((b), right). In (c) and (d), Qz = quartz, Ms = muscovite, and Bt = Biotite, and the scale bar is 0.6 mm. Panel (a) is a DigitalGlobe scene projected in Google Earth (acquisition date 10 March 2016).



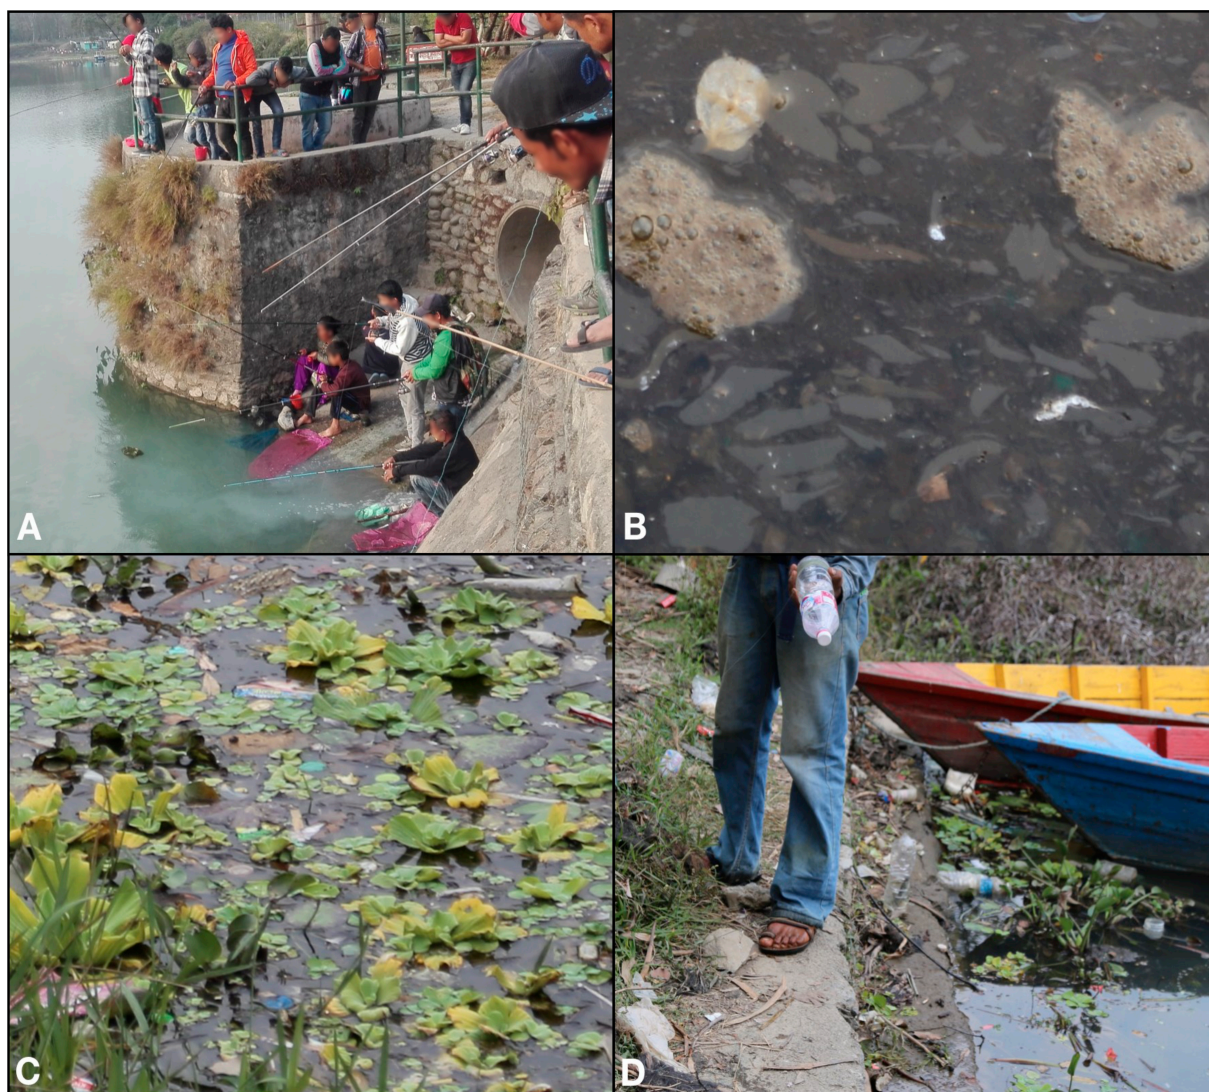

**Figure S6.** Environmental water quality and ecological problems of Phewa Lake. (a) Outlet pipe emits wastewater into the lake, where fishermen extract fish. (b) Evidence of the wastewater effects on water quality. (c) Water hyacinth, an aggressive invasive species from the Amazon Basin has invaded Phewa Lake. (d) Plastic pollution and water hyacinth.

The rampant growth of water hyacinth is maximised by high aqueous organic content, such as in sewage-contaminated sites (Rezania et al, 2015), and by water temperatures in the 25-30°C range (Kasselmann 1995), thus suggesting that urban growth of Pokhara, poorly treated effluent discharges into Phewa Lake, and climate warming (cf. Figure 3e) could act to increase the water hyacinth problem.

## References

Cross, E.A., III, 2014, *The Structure, Stratigraphy, and Evolution of the Lesser Himalaya of Central Nepal*, MS thesis, Department of Geosciences, University of Arizona, 80 pp.

Dhakal, S., 2016, The role of landslides on the sediment budget in Upper Phewa Lake watershed, Western Nepal, MS thesis, Geoinformation and Earth Observation, University of Twente, Enschede, The Netherlands, 65 pp.

DeCelles, P.G., G.E. Gehrels, Y. Najman, A.J. Martin, A. Carter, and E. Garzanti, 2004, Detrital geochronology and geochemistry of Cretaceous-Early Miocene strata of Nepal: implications for timing and diachroneity of initial Himalayan orogenesis, *Earth Planet. Sci. Lett.* 227, 313-330.

Hada, R.S., 1982, *Geologic map of Nepal*, HMG Ministry of Industry, Department of Mines and Geology, Kathmandu, Nepal.

Kasselmann C. 1995. *Aquarienpflanzen*. Egen Ulmer GMBH & Co., Stuttgart. 472 pp. (In German)

Koirala, A., L.N. Rimal, S.M. Sikrikar, and P.M. Pradhan et al. 1998, Engineering and Environmental Geological Map of Pokhara Valley, Scale 1:50,000, publisher: Nepal Department of Mines and Geology, Kathmandu, Nepal.

Martin, A.J., K.D. Burg, A.J. Kaufman, and G.E. Gehrels, 2011, Stratigraphic and tectonic implications of field and isotopic constraints and depositional ages of Proterozoic Lesser Himalayan rocks in Central Nepal, *Precambrian Research* 185, 1-17.

Paudel, L.P. and K. Arita 2000, Tectonic and polymetamorphic history of the Lesser Himalaya in Central Nepal, *Jour. Asian Earth Sci.*, 18, 561-584.

Rezania, S. Taib, S.M. Din, M.F.M. Dahalan, F.A. and Kamyab, H. 2016. Comprehensive review on phytotechnology: heavy metals removal by diverse aquatic plants species from wastewater. *Journal of hazardous materials*, 318, pp.587-599.
